20 **Abstract**

21 Development of T-cell-based subunit protein vaccines against diseases, such as AIDS,  
22 tuberculosis and malaria remains a challenge for immunologists. Here, we have  
23 evaluated whether cross-presentation induced by nanoemulsion adjuvant Adjuplex (ADJ),  
24 can be combined with the immunomodulatory effects of TLR agonists (CpG or  
25 glucopyranosyl lipid adjuvant [GLA]) to evoke protective systemic CD8 T cell-based  
26 immunity to *Listeria monocytogenes* (LM). Vaccination with ADJ, alone or in combination  
27 with CpG or GLA augmented activation and antigen uptake by migratory and resident  
28 dendritic cells and up-regulated CD69 expression on B and T lymphocytes in draining  
29 lymph nodes. By virtue of its ability to engage BATF3-dependent cross-presenting DCs,  
30 ADJ potently elicited effector CD8 T cells that differentiated into a distinct subset of  
31 granzyme B-expressing CD27<sup>LO</sup> effector-like memory CD8 T cells, which provided highly  
32 effective immunity to LM in spleen and liver. CpG or GLA alone did not elicit effector-like  
33 memory CD8 T cells and induced moderate protection in spleen, but not in the liver.  
34 Surprisingly, combining CpG or GLA with ADJ limited the magnitude of ADJ-induced CD8  
35 T cell memory and compromised protective immunity to LM, especially in the liver. Taken  
36 together, data presented in this manuscript provides a glimpse of protective CD8 T cell  
37 memory differentiation induced by a nano-emulsion adjuvant and demonstrates the  
38 unexpected negative effects of TLR signaling on the magnitude of CD8 T cell memory  
39 and protective immunity to listeriosis.

40

41

42 **Importance**

43 To date, the most effective vaccines primarily provide protection by eliciting neutralizing  
44 antibodies, while development of T-cell-based subunit vaccines against infectious  
45 diseases, such as tuberculosis and malaria, remains a challenge for immunologists.  
46 Axiomatically, engagement of multiple innate immune receptors early in the response  
47 might be key to programming effective immunity. Hence, there is an impetus to develop  
48 combination adjuvants that engage multiple innate signaling pathways and additionally  
49 promote cross-presentation to stimulate CD8 T-cell immunity. Here, we show that a nano-  
50 emulsion adjuvant ADJ alone elicits effector-like memory CD8 T cells and provides highly  
51 effective immunity to listeriosis; combining ADJ with TLR agonists, including CpG and  
52 GLA, compromised T cell immunity to LM. In summary, this study provided fundamental  
53 insights into the effects of combining innate immune signaling with nano-emulsion  
54 adjuvants on memory T cell differentiation and protective immunity. These findings are  
55 expected to have implications in the use of combination adjuvants to develop subunit  
56 vaccines that engender systemic CD8 T-cell immunity to intracellular pathogens.

57

## 58 **Introduction**

59

60 Vaccination is a time-tested strategy to control infectious diseases. According to the  
61 World Health Organization, there are currently at least 26 vaccines approved for human  
62 use. Vaccines are broadly categorized into two types: (A) replicating vaccines (e.g. live  
63 attenuated vaccines); (B) non-replicating vaccines (inactivated or subunit vaccines)(1).  
64 Live-attenuated vaccines are highly immunogenic and trigger balanced humoral and cell-  
65 mediated immunity (2). However, their use is contraindicated in immune-compromised  
66 individuals and in pregnancy and there are serious safety concerns regarding adverse  
67 events and reversion to virulence (1),(3),(4-6). Highly purified or recombinant subunits of  
68 pathogens are poorly immunogenic, which necessitates the use of adjuvants to enhance  
69 the immunogenicity of protective antigens in the vaccine (2, 7). Despite decades of  
70 vaccine research, very few adjuvants are licensed for use in humans (2, 7-9). Unlike live-  
71 attenuated vaccines, current inactivated and subunit vaccines formulated with the  
72 licensed adjuvants often confer a shorter duration of immunity, induce antibody biased  
73 responses, require multiple immunizations to maintain protective immunity, and trigger  
74 poor  $T_H1$  /CD8 T cell memory (2, 7, 8, 10). A major goal of vaccine development is to  
75 identify adjuvants that mimic the immunogenicity and durability of live vaccines. There is  
76 emerging consensus that concomitant engagement of multiple innate signaling pathways  
77 is a prerequisite to program durable and potent antibody and T cell responses (2).

78

79 Adjuvants can be described by two key features: antigen delivery enhancement (e.g. alum,  
80 emulsion, liposome) and immune potentiation (Toll-like receptor [TLR] agonists, such as

81 monophosphoryl lipid A [MPL]) (11). Adjuvants and adjuvant combinations consisting of  
82 a delivery system and an immune potentiator synergistically enhance antibody and T cell  
83 responses (11). T cells have been implicated in protection against varicella,  
84 cytomegalovirus, and influenza in humans (2), and there is emerging consensus that  
85 protection against infections, such as AIDS, tuberculosis and malaria, requires antibodies,  
86 memory CD4 T cells and CD8 T cells (12-15). Therefore, it is critical to identify adjuvant  
87 strategies that engender balanced antibody and T cell immunity.

88

89 Carbopol polymers (also known as carbomers) are polymers of acrylic acid (16-19) with  
90 immune modulating properties (20, 21). Adjuplex (ADJ; Advanced Bioadjuvants) is a  
91 nano-emulsion adjuvant composed of carbomers and highly purified soy lecithin.  
92 Carbomer-based adjuvants have shown great promise in veterinary vaccines (22, 23), in  
93 stimulating neutralizing antibodies against HIV and malaria antigens (24, 25), and also in  
94 experimental vaccines against influenza virus in mice (26-29). Combination adjuvants  
95 provide effective T cell-based immunity to influenza A virus (29), but is unknown whether  
96 vaccines formulated in ADJ can provide T-cell-based protection against systemic  
97 infections.

98

99 In this study, we tested whether combining ADJ with clinically tested TLR agonists, CpG  
100 or glucopyranosyl lipid A (GLA), potentiated the adjuvanticity of ADJ to elicit effective T-  
101 cell-based immunity to the intracellular pathogen, *Listeria monocytogenes*. Adjuvants  
102 alone or in combination elicited strong innate responses in draining lymph nodes (DLNs),

103 including the activation and engagement of migratory and resident DCs. ADJ effectively  
104 activated and expanded antigen-specific effector CD8 T cells to model protein antigen  
105 chicken ovalbumin (OVA) by mechanisms dependent upon BATF3-dependent cross-  
106 presenting DCs *In vivo*. Notably, effector CD8 T cells elicited by ADJ alone or in  
107 combination with CpG or GLA, differentiated into a distinct granzyme B-expressing  
108 memory T cell subset termed effector-like memory CD8 T cells. Unexpectedly, combining  
109 CpG or GLA with ADJ compromised ADJ-induced protective immunity against listeriosis  
110 by limiting the number of memory CD8 T cells and the magnitude of recall T cell  
111 responses to listeria challenge. These findings highlight the consequences to the use of  
112 combination adjuvants in eliciting effective CD8 T cell-based systemic immunity to  
113 intracellular pathogens.

114

115

116

117

118

119

120

121

122

123

124

125 **RESULTS**

126 ***Combination adjuvants recruit and activate innate and adaptive cells in vaccine-***  
127 ***draining lymph node***

128 We tested whether combining TLR agonists GLA or CpG alone or with adjuvax affected  
129 the innate cellular response following vaccination in the footpad. At 24 hours after  
130 vaccination, there was a 8- to 10-fold increase in cellularity in popliteal lymph node, the  
131 draining lymph node (DLN), in comparison to DLN of mice vaccinated with control PBS  
132 or OVA (**Fig. 1A**). Further analysis of immune cell subsets (**Fig. S1**) revealed a  
133 substantive increase in the accumulation of monocytes, neutrophils, XCR1<sup>+</sup> CD103<sup>+</sup>  
134 migratory DCs, CD8 $\alpha^+$ /CD8 $\alpha^-$  resident DCs, CD4 T cells, CD8 T cells, and B cells in the  
135 DLN (**Fig. 1B**), following vaccination with all adjuvants, as compared to no adjuvant  
136 control. There were no significant differences in the number of B or T cells between  
137 various adjuvant groups. Notably, GLA alone elicited fewer monocytes, migratory DCs,  
138 and lymphoid DCs, in comparison to ADJ, CpG, ADJ+CpG and ADJ+GLA groups.  
139 ADJ+CpG recruited the greatest number of neutrophils, among all adjuvants (**Fig. 1B**).

140

141 To further assess the immunostimulatory effects of various adjuvants on DCs, we  
142 measured cell surface expression of co-stimulatory molecules CD80 and CD86. At 24  
143 hours post-vaccination, XCR1<sup>+</sup> CD103<sup>+</sup> migratory DCs (mDCs) and CD8 $\alpha^+$  tissue-  
144 resident DCs (rDCs) in DLNs of all vaccinated mice displayed significantly ( $P < 0.05$ )  
145 increased expression of CD80 and CD86 (**Fig. 1C-D**), but ADJ appears to be the  
146 strongest activator of CD80/CD86 levels in mDCs and rDCs. Exposure to an inflammatory

147 milieu is known to downregulate the expression of transcription factor Kruppel-like factor  
148 2 (KLF2) in innate myeloid cells (30). Therefore, as a measure of the effect of vaccine-  
149 elicited inflammatory response on DCs, we quantified KLF2 expression levels in innate  
150 immune cell populations using KLF2-GFP reporter mice. We found that KLF2 expression  
151 in XCR1<sup>+</sup> CD103<sup>+</sup> migratory DCs was strongly downregulated by ADJ, as compared to  
152 CpG and GLA (**Fig. 1E**). However, KLF2 downregulation in CD8 $\alpha$ <sup>+</sup> resident DCs was  
153 uniformly induced by all adjuvants (**Fig. 1F**).

154

155 Next, we measured the effect of adjuvants on CD4 and CD8 T cells, and B cells in DLNs  
156 by measuring the expression of the early activation marker CD69. Within 24 hours of  
157 vaccination, all adjuvants triggered higher levels of CD69 expression on B cells, and  
158 CD4/CD8 T cells in DLNs, as compared to OVA group (**Fig. 1G-H**). Note the additive  
159 effect of combining ADJ and CpG in inducing CD69 expression on T cells. Together, our  
160 data strongly suggested that ADJ, CpG, and GLA effectively recruit and/or activate  
161 conventional DCs and T cells in DLNs.

162

### 163 ***ADJ and TLR agonists enhance antigen uptake by various innate immune cells in*** 164 ***vivo***

165 We explored whether various adjuvants affected antigen uptake and activation of APCs  
166 in DLNs by vaccinating mice with Alexa Fluor 647-labeled OVA formulated with various  
167 adjuvants. At 24 hours after vaccination, all adjuvants significantly augmented the number  
168 of OVA-647<sup>+</sup> cells in DLNs (**Fig. 2A-B**). We also found that innate immune cells, including



169 monocytes, neutrophils, XCR1<sup>+</sup> CD103<sup>+</sup> mDCs and CD8 $\alpha$ <sup>+</sup> rDCs, internalized antigen in  
170 vaccinated mice (**Fig. 2C**). Taken together, data in **Fig. 1 and 2** suggested that ADJ and  
171 TLR-based adjuvants augmented varying levels of leukocyte recruitment, DCs' activation  
172 and antigen-containing DCs in DLN.

173

174 ***Effect of TLR agonists on ADJ-driven DC cross-presentation in vitro and the role***  
175 ***of BATF3 on ADJ-induced CD8 T cell responses in vivo***

176 We have previously demonstrated that ADJ enhanced antigen cross-presentation by DC-  
177 like cells *in vitro* (28); it was of interest to investigate whether inclusion of TLR agonists  
178 synergistically augmented ADJ-induced DC cross-presentation *in vitro*. To this end,  
179 BMDCs were treated with OVA formulated in ADJ, CpG, GLA, ADJ+CpG or ADJ+GLA.  
180 Subsequently, BMDCs were evaluated for their capacity to activate SIINFEKL-specific  
181 B3Z T cell hybridoma cells using a reporter assay (31, 32). ADJ-treated BMDCs potently  
182 activated  $\beta$ -gal production in B3Z cells, whereas BMDCs treated with CpG or GLA failed  
183 to activate B3Z cells to levels greater than in OVA-stimulated BMDCs (**Fig. S2**). Cross-  
184 presentation by BMDCs treated with ADJ+CpG or ADJ+GLA was comparable to that in  
185 ADJ-treated BMDCs. Hence, TLR agonists failed to further augment ADJ-induced cross-  
186 presentation by DCs, *in vitro*.

187

188 BATF3-dependent DCs are required for effective cross-presentation and activation of  
189 CD8 T cells *in vivo* (33). To evaluate the requirement for BATF3-dependent DCs in cross-  
190 priming CD8 T cells by ADJ, we immunized wild type (WT) and BATF3-deficient (BATF3<sup>-</sup>

191 <sup>-/-</sup> mice subcutaneously (SQ) with OVA formulated in ADJ. At day 8 after vaccination, we  
192 enumerated OVA SIINFEKL-specific CD8 T cells in spleen. We found that BATF3  
193 deficiency abolished the activation and expansion of SIINFEKL-specific CD8 T cells in  
194 spleen, which suggested that BATF3 is required for ADJ-driven CD8 T cell responses to  
195 subunit vaccines (**Figure 2D**).

196

197 Because we have observed increased numbers of antigen-containing monocytes in DLNs  
198 of mice vaccinated with various adjuvants, we next interrogated whether monocytes are  
199 required in cross-priming CD8 T cells by ADJ-based subunit protein vaccines. To this end,  
200 we vaccinated cohorts of WT and CCR2-deficient (CCR2<sup>-/-</sup>) mice SQ with ADJ+OVA,  
201 and quantified OVA SIINFEKL-specific CD8 T cells in spleens at day 8 after immunization.  
202 CCR2 deficiency did not significantly affect the accumulation of SIINFEKL-specific CD8  
203 T cells in spleens, suggesting that monocytes were not required for ADJ-driven antigen  
204 cross-presentation and/or expansion of CD8 T cells *in vivo* (**Figure 2E**).

205

206 ***Differentiation of effector CD8 T cells in spleen following vaccination with***  
207 ***ADJ/TLR-agonist-based combination adjuvants***

208 To investigate whether combination adjuvants differed in terms of the magnitude and  
209 nature of the CD8 T cell response, we vaccinated mice SQ twice (21 days apart) with  
210 OVA formulated in ADJ, CpG, GLA, ADJ+CpG or ADJ+GLA. At day 8 after boost, we  
211 quantified OVA SIINFEKL-specific CD8 T cells in spleens (**Fig. 3A**). Frequencies and  
212 numbers of SIINFEKL-specific CD8 T cells in spleen of ADJ groups were significantly

213 (P<0.05) higher than in CpG or GLA groups. Notably, CpG and GLA failed to further  
214 enhance ADJ-induced splenic CD8 T cell responses.

215

216 We quantified CD127 and KLRG-1 expression to determine the differentiation state of  
217 SIINFEKL-specific effector CD8 T cells as: short-lived effector cells (SLECs;  
218 CD127<sup>LO</sup>/KLRG-1<sup>HI</sup>), memory precursor effector cells (MPECs; CD127<sup>HI</sup>/KLRG-1<sup>LO</sup>) and  
219 transition effector cells (TEs; CD127<sup>HI</sup>/KLRG-1<sup>HI</sup>) in spleens of vaccinated mice (**Fig. 3B**).  
220 ADJ and CpG induced the highest levels of KLRG-1 expression, as compared to GLA  
221 alone, with no significant differences in CD127 expression between groups. Consequently,  
222 the relative proportions of CD127<sup>HI</sup>/KLRG-1<sup>HI</sup> TEs were higher in ADJ and CpG groups,  
223 as compared to the GLA group. Combining ADJ with CpG reduced the percentages of  
224 MPECs, as compared to CpG alone. In comparison to GLA mice, the combination of ADJ  
225 and GLA enhanced the percentages of TEs, at the expense of MPECs in the GLA group.  
226 Similar to KLRG-1 expression, ADJ was linked to elevated expression of CX3CR1 in  
227 SIINFEKL-specific effector CD8 T cells (**Fig. 3C**). The high-level induction of KLRG-1 and  
228 CX3CR1 by ADJ was not linked to significant (P<0.05) alterations in the expression of  
229 transcription factors T-bet, EOMES or BATF (**Fig. 3D**). In summary, ADJ appeared to  
230 promote greater terminal differentiation of effector CD8 T cells in vaccinated mice than  
231 other tested adjuvant combinations.

232

233 Next, we questioned whether different combinations of adjuvants affected the functionality  
234 of effector CD8 T cells. ADJ and TLR agonists induced readily detectable levels of the

235 effector molecule granzyme B, and combining CpG or GLA with ADJ tended to promote  
236 granzyme expression, especially compared to GLA group (**Fig. 3D**). SIINFEKL-specific  
237 CD8 T cells induced by all adjuvants exhibited polyfunctionality and produced both IFN- $\gamma$   
238 and TNF- $\alpha$ , upon antigenic stimulation *ex vivo*. The differences in the frequencies of  
239 cytokine-producing CD8 T cells among different groups reflect varying frequencies of  
240 antigen-specific CD8 T cells (**Fig. 3E**).

241

#### 242 ***Effector-like CD8 T-cell memory in mice vaccinated with combination adjuvants***

243 40 days after booster vaccination, we quantified and characterized SIINFEKL-specific  
244 memory CD8 T cells in spleens. Spleens of mice vaccinated with ADJ alone contained  
245 significantly ( $P < 0.05$ ) higher frequencies and numbers of SIINFEKL-specific memory CD8  
246 T cells, than in other groups (**Fig. 4A**). Strikingly, spleens of mice vaccinated with ADJ,  
247 ADJ+CpG and ADJ+GLA were enriched for KLRG-1<sup>Hi</sup>/CX3CR-1<sup>Hi</sup>/CD27<sup>Lo</sup>/granzyme B<sup>Hi</sup>  
248 SIINFEKL-specific memory CD8 T cells, that are reminiscent of effector-like memory CD8  
249 T cells described by Jameson's group (34) (**Fig. 4B-E**). These data suggested that ADJ  
250 drove the differentiation of effector-like memory CD8 T cells following vaccination;  
251 combining CpG or GLA with ADJ might have dampened the number of memory CD8 T  
252 cells in spleen. We next assessed the ability of memory CD8 T cells to produce cytokines,  
253 upon *ex vivo* antigenic stimulation. A substantive proportion of CD8 T cells in spleens  
254 from the ADJ group produced both IFN- $\gamma$  and TNF- $\alpha$ , upon stimulation with the SIINFEKL  
255 peptide (**Fig. 4F**). Thus, ADJ promoted the differentiation of highly functional effector-like  
256 SIINFEKL-specific memory CD8 T cells in spleens of vaccinated mice.

257 ***Addition of TLR agonists compromises ADJ-induced CTL immunity to listeriosis***

258 To assess CD8 T cell memory-dependent protection against listeriosis, we vaccinated  
259 mice with OVA formulated in aforementioned adjuvants. Forty days after booster  
260 vaccination, mice were challenged with virulent recombinant *Listeria monocytogenes*  
261 expressing OVA (LM-OVA). On the 5<sup>th</sup> day after LM-OVA challenge, we quantified  
262 bacterial burden in spleens and liver, and recall T cell responses in spleens. High titers  
263 of listeria were detected in the spleens and livers of mice that were unvaccinated or  
264 vaccinated with OVA (**Figs. 5A-B**). Tissues of ADJ-vaccinated mice contained the lowest  
265 bacterial burden and provided the most effective protection in spleen and liver, as  
266 compared to unvaccinated and other adjuvant groups. Protections afforded by CpG, GLA,  
267 ADJ+CpG and ADJ+GLA vaccination were comparable in spleen, but significantly ( $P <$   
268 0.05) better than in OVA group. However, vaccination with CpG, GLA, ADJ+CpG or  
269 ADJ+GLA failed to control listeria burden in the liver. Notably, associated with better  
270 bacterial control, SIINFEKL-specific memory CD8 T cells in ADJ mice displayed the  
271 strongest recall responses and expressed lowest granzyme B levels, as compared to  
272 other adjuvant groups (**Figs. 5C-F**). Thus, combining CpG or GLA with ADJ compromised  
273 ADJ-induced T-cell based protective immunity to listeriosis, particularly in the liver.

274

275

276

## 277 **Discussion**

278

279 Establishment of durable and protective memory T cells remains an unrealized goal of  
280 developing vaccines against infectious diseases that require T-cell based immunity,  
281 including HIV/AIDS, malaria, and tuberculosis (13-15, 35). Studies of live attenuated  
282 yellow fever vaccine suggest that engagement of multiple innate immune receptors during  
283 the very early phase of the immune response might be essential for programming durable  
284 immunity to vaccinations (36, 37). Using ADJ, a polyacrylic acid-based nano-emulsion  
285 adjuvant that is known to induce neutralizing antibodies against HIV and malaria (22-25),  
286 we have probed whether combining ADJ with TLR agonists enhanced T cell-based  
287 vaccine immunity to listeriosis and defined the differentiation state and the phenotypic  
288 and functional attributes of antigen-specific memory CD8 T cells induced by combination  
289 adjuvants.

290

291 It is widely believed that elicitation of less differentiated central memory CD8 T cells that  
292 have high proliferative capacities are crucial for enduring T-cell immunity (38).  
293 Interestingly, however, Olson *et al.* reported the existence of protective effector-like  
294 memory CD8 T cells, which display constitutive cytolytic activity but limited proliferative  
295 potential in listeria-immune mice. Such effector-like memory CD8 T cells exhibited  
296 phenotypic attributes of terminal differentiation, including high levels of KLRG-1 and  
297 diminished levels of CD27, but provided the most effective systemic protection against  
298 listeria. The induction of such effector-like memory CD8 T cells by adjuvanted vaccines  
299 has not been reported to date. Unexpectedly, we find that ADJ-based vaccines potently

300 induced differentiation of effector-like memory CD8 T cells  
301 (KLRG1<sup>HI</sup>/CX3CR1<sup>HI</sup>/CD43<sup>HI</sup>/CD127<sup>HI</sup>/CD27<sup>LO</sup>/Granzyme-B<sup>HI</sup>) in spleen, while GLA or  
302 CpG did not. According to the linear model of memory T cell differentiation, activated T  
303 cells progress towards terminal differentiation and lose their memory potential as a  
304 function of the cumulative strength of antigenic stimulation and the degree of inflammation  
305 (38). It is unknown where effector-like memory CD8 T cells emerge from in the spectrum  
306 of T cell differentiation. We theorize that effector-like memory CD8 T cells emerge from  
307 an intermediate state of differentiation that give to rise to effector memory cells and  
308 terminal effector cells. It will be interesting to test whether this distinct hybrid state is a  
309 sequel to an epigenetically imprinted constitutive effector program in conjunction with a  
310 CD127-driven IL-7-dependent survival program.

311

312 How ADJ promotes the differentiation of effector-like memory CD8 T cells remains  
313 unknown. Since effector-like memory CD8 T cells are induced during listeriosis (34), we  
314 speculate that the immunological milieu and/or the strength of antigenic stimulation  
315 experienced by responding CD8 T cells following ADJ-based vaccination mimics listeria  
316 infection, leading to the programming of effector-like memory CD8 T cells. All adjuvants  
317 induced comparable levels of antigen-containing innate cells *in vivo*; combining CpG or  
318 GLA with ADJ did not enhance or negatively affect ADJ-driven DC cross-presentation *in*  
319 *vitro*. However, one of the notable observations was that ADJ drove the highest  
320 expression of co-stimulatory molecules, including CD80 and CD86, and induced the most  
321 potent inflammatory response, as evidenced by downregulation of KLF2 expression, in  
322 XCR1<sup>+</sup> CD103<sup>+</sup> mDCs. It is noteworthy that, as compared to CD8 $\alpha$ <sup>-</sup> and CD103<sup>-</sup> cDC

323 subsets, CD8 $\alpha$ <sup>+</sup> and CD103<sup>+</sup> cDC subsets are the most prominent cross-presenting DC  
324 subsets and immunization studies in Batf3<sup>-/-</sup> mice strongly suggest an important role for  
325 CD8 $\alpha$ <sup>+</sup> rDCs and CD103<sup>+</sup> mDCs in vaccine-elicited T cell responses (33). Therefore, it is  
326 possible that the level of T cell signaling (co-stimulatory and inflammatory) evoked by ADJ  
327 (29) is conducive for differentiation of effector-like memory CD8 T cells. More mechanistic  
328 studies are warranted to evaluate the nature of the inflammatory milieu and the  
329 strength/duration of TCR signaling in regulating the differentiation of effector-like memory  
330 CD8 T cells in DLNs.

331

332 Parenteral vaccination with ADJ alone provided the most effective protection against  
333 listeria challenge, as compared to CpG, GLA, ADJ+GLA and ADJ+CpG. Unexpectedly,  
334 combining CpG or GLA with ADJ compromised ADJ-induced protective immunity. The  
335 diminished protective immunity induced by combination adjuvants ADJ+GLA or  
336 ADJ+CpG was linked to reduced accumulation of effector cells (clonal burst size) and  
337 consequent reduction in the number of memory CD8 T cells. Reduced number of memory  
338 CD8 T cells, in turn, limited the magnitude of recall T-cell responses and compromised  
339 listeria control in mice vaccinated with ADJ+GLA or ADJ+CpG. Less effective listeria  
340 control in CpG, GLA, ADJ+CpG and ADJ+GLA was not associated with impaired effector  
341 functions, including cytokine production or granzyme B expression of CD8 T cells.  
342 Interestingly however, CD8 T-cell expression of granzyme B in listeria-challenged mice  
343 showed a clear negative correlation with listeria load in spleen and liver. In the spleen of  
344 ADJ mice that effectively controlled listeria, SIINFEKL-specific CD8 T cells expressed  
345 lower levels of granzyme-B, as compared to other vaccine groups, especially the CpG



346 and GLA groups. It is likely that higher granzyme B expression in CD8 T cells reflects  
347 ongoing antigenic stimulation due to higher bacterial load in mice with compromised  
348 vaccine-induced immunity. Although it is unclear how combining CpG or GLA with ADJ  
349 negatively modulates the accumulation of effector CD8 T cells and protective immunity,  
350 the data presented in this manuscript nevertheless strongly suggest that combination  
351 adjuvants may not always enhance vaccine-induced T-cell immunity. It is noteworthy to  
352 highlight that unlike parenteral vaccination, intranasal vaccination with combination  
353 adjuvants, such as ADJ+GLA and ADJ+CpG, markedly enhance ADJ-induced pulmonary  
354 T-cell immunity to influenza A virus (29). Therefore, tenets for inducing systemic versus  
355 mucosal T-cell immunity with combination adjuvants are different, and further studies are  
356 essential to elucidate the underlying mechanisms.

357  
358 In summary, we have systematically evaluated the spectrum of effects evoked by a nano-  
359 emulsion adjuvant in combination with immunomodulatory adjuvants CpG and GLA in  
360 terms of antigen uptake by various innate immune cells, accumulation of innate cells,  
361 polyclonal activation of B and T cells, inflammation-induced downregulation of KLF2 in  
362 DCs and activation of migratory and lymphoid-resident DCs in DLNs. Furthermore, we  
363 document the effect of combination adjuvants on the clonal burst size of effector cells, the  
364 magnitude and nature of CD8 T cell memory, the magnitude of recall T cell responses  
365 and T cell-based protective immunity to the prototypic intracellular pathogen, *Listeria*  
366 *monocytogenes*. These studies provided unexpected insights into the nature of vaccine-  
367 elicited T-cell memory and protective immunity to intracellular pathogens. Further,  
368 contrary to prevailing opinion in the vaccine adjuvant field, we found that combining

369 adjuvants might have unintended negative effects on T-cell-based protective immunity.  
370 Taken together, findings reported in this manuscript provide new insights into the  
371 differentiation of CD8 T cells induced by adjuvanted subunit vaccines, which might pave  
372 the way for the rational development of adjuvants that elicit effective T-cell immunity to  
373 intracellular pathogens.

374 **METHODS**

375 **Experimental animals**

376 7-12-week-old C57BL/6J (B6) were purchased from restricted-access SPF mouse  
377 breeding colonies at the University of Wisconsin-Madison Breeding Core Facility or from  
378 Jackson Laboratory. *Batf3*<sup>-/-</sup> (Stock number: 013755) and *CCR2*<sup>-/-</sup> (Stock number: 004999)  
379 were purchased from Jackson Laboratory. KLF2-GFP reporter mice were provided by Dr.  
380 Jameson (University of Minnesota, Minneapolis, MN).

381

382 **Ethics statement**

383 All experiments were performed in accordance with the animal protocol (Protocol number  
384 V5308 or V5564) approved by the University of Wisconsin School of Veterinary Medicine  
385 Institutional Animal Care and Use Committee. The animal committee mandates that  
386 institutions and individuals using animals for research, teaching, and/or testing must  
387 acknowledge and accept both legal and ethical responsibility for the animals under their  
388 care, as specified in the Animal Welfare Act and associated Animal Welfare Regulations  
389 and Public Health Service (PHS) Policy.

390

391 **B3Z cell hybridoma and BMDC generation**

392 The B3Z hybridoma was a generous gift from Dr. Bruce Klein (University of Wisconsin-  
393 Madison). B3Z cells were maintained in Iscove's Modified Dulbecco's media  
394 supplemented with 10% FBS, 100 U/ml penicillin G and 100 g/ml streptomycin sulfate.  
395 Primary cultures of bone marrow-derived DCs were generated as previously described  
396 (39, 40).

397 **B3Z activation assay for *in vitro* cross presentation**

398 The cross-presentation capacity of murine BMDCs was measured using B3Z hybridoma  
399 cells, as previously described (31, 32). Briefly, DCs were plated at  $1 \times 10^5$  cells/well in 96-  
400 well round bottom culture-treated plate (Corning). BMDCs were cultured with OVA  
401 (1mg/ml) in combination of different adjuvants (ADJ [1%] , CpG [5ug/ml], GLA [1ug/ml])  
402 for 5 hours. Next, BMDCs were fixed with 0.025% glutaraldehyde for 2 minutes at room  
403 temperature, washed with PBS and cultured with B3Z cells ( $1 \times 10^5$  cells/well) for 18 hours.  
404 After 18 hours, B3Z cells were washed and incubated with CPRG substrate (0.15mM,  
405 Santa Cruz Biotechnology, sc-257242) in 200ul of lysis buffer (0.1% NP 40+ PBS) for 18  
406 hours at room temperature. The absorbance (590nm) was measured using a plate reader.  
407 Wells containing B3Z cells + BMDCs without OVA served as background control.

408

409 **Immunization**

410 Hen egg white ovalbumin grade-V (OVA) was purchased from Sigma-Aldrich (St. Louis,  
411 MO). Adjuvax (ADJ), CpG-ODN 1826 (CpG) oligonucleotide and Glucopyranosyl Lipid  
412 Adjuvant (GLA) were purchased from Empirion LLC (Columbus, OH), InvivoGen (San  
413 Diego, CA) and Avanti Polar Lipids, Inc. (Alabaster, AL), respectively. For footpad  
414 immunization, mice were briefly anesthetized with isoflurane, after which 15 ug of Alexa  
415 Fluor 647-conjugated chicken OVA (Thermo Fisher) formulated in saline, ADJ (5%), CpG  
416 (5ug), GLA (5ug), ADJ (5%)+CpG (5ug) or ADJ (5%) + GLA (5ug) was injected to hind  
417 footpad. For SQ vaccination, C57BL/6J mice were vaccinated at the tail base with 50ul of  
418 the vaccine: ovalbumin (10ug) formulated in saline, ADJ (5%), CpG (5ug), GLA (5ug),

419 ADJ (5%) + CpG (5ug) or ADJ (5%) + GLA (5ug). Mice were boosted after 21 days of the  
420 initial vaccination.

421

#### 422 **Tissue processing and Flow cytometry.**

423 The vaccine-draining popliteal LN was incubated with 3ml of filtered 1mg/ml collagenase  
424 D (Roche) for 30 minutes at 37 C'. The digested lymph nodes were further mechanically  
425 processed, filtered, to generate single cell suspensions. Spleens were mechanically  
426 processed into single-cell suspensions using standard procedures. Single-cell  
427 suspensions were first stained for viability with LiveDead eFlour 780 stain (eBioscience)  
428 for 30 minutes on ice. Next, samples were stained with antibodies diluted in Brilliant Stain  
429 Buffer (BD Biosciences) for 30 minutes (for innate immune cells, as previously described  
430 (41)) or 60 minutes (for T cell immunophenotyping) with K<sup>b</sup>/SIINFEKL tetramers (provided  
431 by Emory MHC tetramer facility, Atlanta) and antibodies listed in Supplementary table 1.  
432 Following staining, cells were washed with FACS buffer (0.1% BSA + PBS) twice and  
433 fixed with 2% paraformaldehyde for 10 minutes on ice. Samples were washed again twice  
434 with FACS buffer and acquired on LSRFortessa (BD Biosciences) and analyzed with  
435 FlowJo V.10 software (TreeStar, Ashland, OR).

436

#### 437 **Intracellular staining for transcription factors**

438 To stain for transcription factors or granzyme B, cells were first stained for viability with  
439 LiveDead eFlour 780 stain (eBioscience) for 30 minutes and then stained with antibodies  
440 and MHC I tetramers diluted in Brilliant Stain Buffer (BD Biosciences) for 60 minutes. The  
441 samples were then fixed, permeabilized and subsequently stained for transcription factors

442 using the transcription factors staining kit (eBioscience) with the antibodies listed in  
443 Supplementary table 1 in Perm Wash buffer. All samples were acquired on LSRFortessa  
444 (BD Biosciences) and analyzed with FlowJo V.10 software (TreeStar, Ashland, OR).

445

#### 446 **Intracellular cytokine staining**

447 For intracellular cytokine staining, one million cells ( $1 \times 10^6$ ) cells were plated on flat-  
448 bottom tissue-culture-treated 96-well plates (Corning) Cells were stimulated for 5 hours  
449 at 37C in the presence of brefeldin A (1  $\mu$ l/ml, GolgiPlug, BD Biosciences), human  
450 recombinant IL-2 (10 U/well) and with or without SIINFEKL peptide (Genscript) at  
451 0.2ug/ml. After *ex vivo* peptide stimulation, cells were stained for viability dye (LiveDead  
452 eFluor 780) for 30 minutes, stained with surface antibodies, and fixed/permeabilized  
453 with Cytofix/Cytoperm kit (BD Biosciences, Franklin Lakes, NJ) according to  
454 manufacturer's protocol. Samples were stained with anti-cytokine antibodies listed in  
455 Supplementary table 1 in perm wash buffer for 30 minutes, washed with perm wash buffer,  
456 and re-suspended in FACS buffer before flow cytometry.

457

#### 458 **Vaccination and enumeration of Listeria Challenge**

459 At > 40 days after booster vaccination, mice were challenged intravenously with  $1.7 \times 10^5$   
460 CFUs of LM-OVA (*Listeria monocytogenes* expressing chicken ovalbumin (LM-OVA),  
461 provided by Dr. Hao Shen (University of Pennsylvania School of Medicine). To quantify  
462 Listeria burdens, tissues were homogenized in GentleMACS C-Tubes (Miltenyi) via  
463 GentleMACS dissociator. Organs were processed in sterile 0.1% Nonidet-P40 (VWR) +  
464 PBS in gentleMACS C Tubes. Serial dilutions of tissue samples (undiluted to  $10^6$ ) were

465 plated on brain heart infusion agar plates for 24 hours at 37 C'. Listeria burden in tissues  
466 were normalized by the weight of the tissues.

467

### 468 **Statistical analyses**

469 Statistical analyses were performed using GraphPad software 8.1.1 (La Jolla, CA). All  
470 comparisons were made using either Mann-Whitney U test or an one-way ANOVA test  
471 with Tukey corrected multiple comparisons where  $p < 0.05 = *$ ,  $p < 0.005 = **$ ,  $p < 0.0005 =$   
472  $***$  were considered significantly different among groups. Bacterial titers were log  
473 transformed prior to analysis. One statistical outlier was excluded from analysis of CpG-  
474 vaccinated mice in Listeria challenge experiment.

475

### 476 **Acknowledgements**

477 We would like to thank all the members of Suresh Laboratory for constructive feedback  
478 and technical assistance and genuine appreciation for the efforts of the veterinary and  
479 animal care staff at UW-Madison. Thanks to Zachary Morrow (Dr. JD Sauer Lab) for  
480 Listeria challenge experiment. We are thankful to the Emory NIH Tetramer Core Facility  
481 for providing MHC-I tetramers.

482

### 483 **Funding**

484 This work was supported by PHS grant U01 AI124299, R21 AI149793-01A1 and John E.  
485 Butler professorship to M. Suresh. Woojong Lee was supported by a predoctoral  
486 fellowship from the American Heart Association (18PRE34080150).

487

488 **Author contributions:**

489 WL, AL and MS designed, performed, analyzed experiments, and provided conceptual  
490 input for the manuscript. BB provided technical expertise and intellectual insights for the  
491 manuscript. WL and MS wrote the manuscript, which was proofread by all authors.

492

493

494

495

496

497

498

499

500

501

502

503

504

505

506



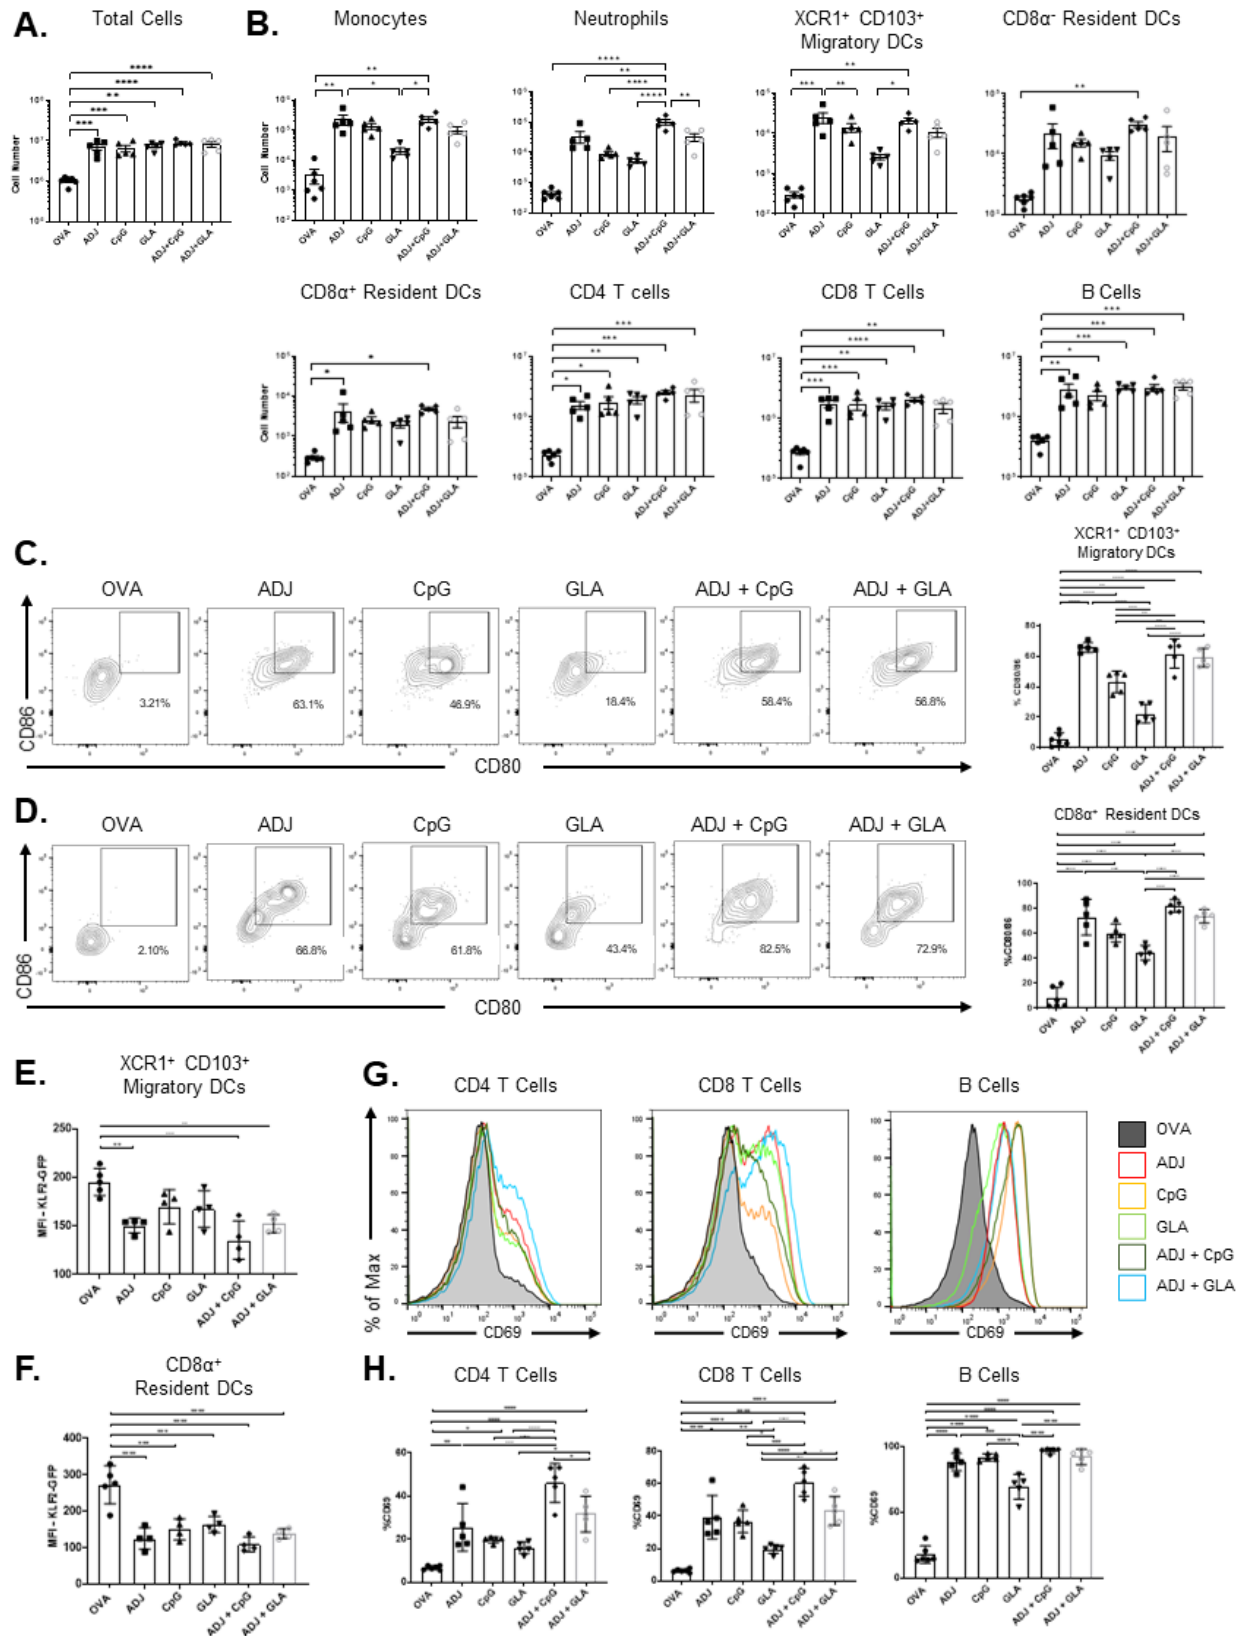

507

508 **Figure 1. ADJ and TLR-agonist based vaccines induce recruitment and activation**  
509 **of innate and adaptive immune cells in DLNs.** Mice were vaccinated SQ with OVA  
510 formulated in ADJ, CpG, GLA, ADJ+CpG or ADJ+GLA. Twenty-four hours after  
511 vaccination, DLNs were processed into single-cell suspensions and stained with  
512 antibodies conjugated to fluorophores. (A) Total cell count of DLN from vaccinated mice.  
513 (B) Effect of vaccinations on numbers of Ly6C<sup>+</sup> monocytes, Ly6G<sup>+</sup> neutrophils,  
514 XCR1<sup>+</sup> CD103<sup>+</sup> migratory DCs, B220<sup>+</sup> CD19<sup>+</sup> B cells, CD4<sup>+</sup> T cells, and CD8<sup>+</sup>  
515 T cells, as assessed by FACS analysis using gating strategy shown in Fig S1. (C-D).  
516 Activation status of XCR1<sup>+</sup> CD103<sup>+</sup> migratory DCs (C) and CD8 $\alpha$ <sup>+</sup> resident DCs (D),  
517 as measured by CD80/86 expression. (E-F) Median fluorescence intensity of KLF2-GFP  
518 in XCR1<sup>+</sup> CD103<sup>+</sup> migratory DCs (E) and CD8 $\alpha$ <sup>+</sup> resident DCs (F). (G-H) CD69  
519 expression by CD4, CD8, and B cells. Data are the Mean  $\pm$  SEM from one of two  
520 independent experiments with 4-5 mice per group. \*, \*\*, \*\*\*, and \*\*\*\* indicate significance  
521 at  $P < 0.1$ , 0.01, 0.001, and 0.0001 respectively. (One-way ANOVA: A-H)

522

523

524

525

526

527

528

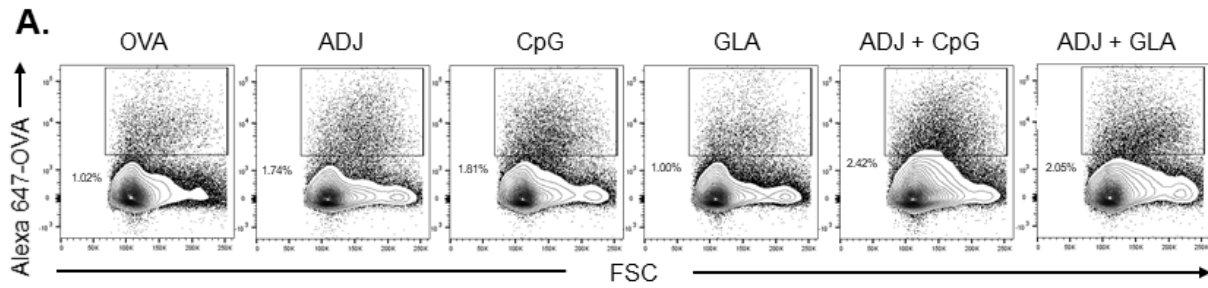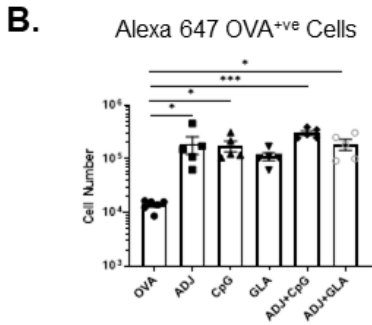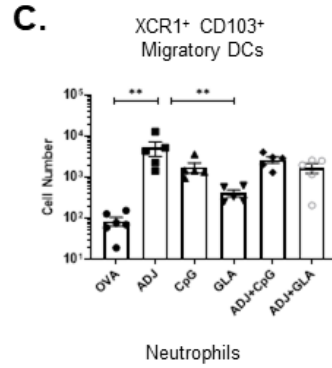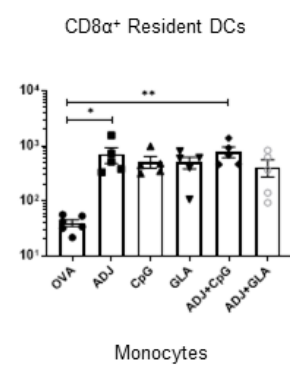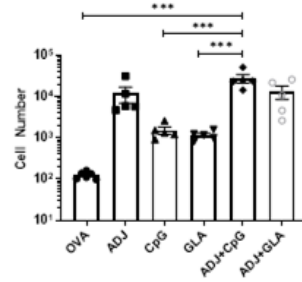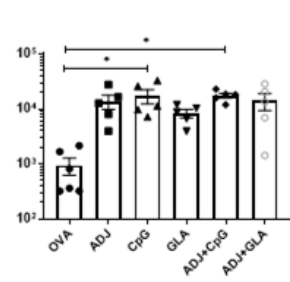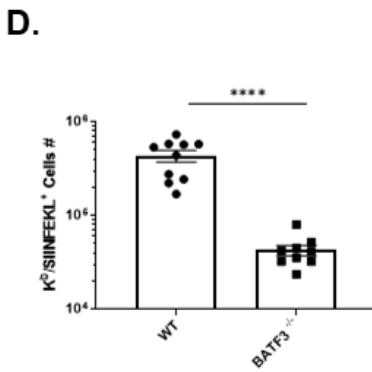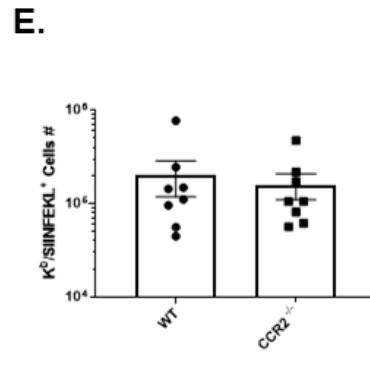

530 **Figure 2. Vaccine adjuvants target antigens to conventional DCs in the DLNs,**  
531 **leading to efficient cross-presentation and CD8 T cell activation *in vivo***

532 Mice were vaccinated SQ with Alexa Fluor 647 (AF 647)-conjugated OVA formulated in  
533 ADJ, CpG, GLA, ADJ+CpG, or ADJ+GLA. Twenty-four hours after vaccination, DLNs  
534 were mechanically processed into single-cell suspensions. (A) Antigen-containing cells  
535 were visualized using AF647-conjugated OVA by flow cytometry. (B) Total numbers of  
536 AF647-OVA<sup>+</sup> cells. (C) Total numbers of AF647-OVA<sup>+</sup> immune cell subsets (XCR1<sup>+</sup>  
537 CD103<sup>+</sup> migratory DCs, CD8 $\alpha$ <sup>+</sup> resident DCs, neutrophils, and monocytes). (D) Wild  
538 type (WT) B6 and BATF3-deficient (BATF3<sup>-/-</sup>) mice were vaccinated SQ with OVA (10ug)  
539 formulated in ADJ (5%). On the 8th day after vaccination, the total number of activated  
540 OVA SIINFEKL-specific CD8 (CD44<sup>+</sup>, K<sup>b</sup>/SIINFEKL<sup>+</sup>) T cells in the spleen were  
541 quantified by flow cytometry. (E) WT B6 and CCR2-deficient (CCR2<sup>-/-</sup>) mice were  
542 vaccinated SQ with OVA (10ug) + ADJ (5%). On the 8th day after vaccination, the total  
543 number of activated OVA SIINFEKL-specific CD8 (CD44<sup>+</sup>, K<sup>b</sup>/SIINFEKL<sup>+</sup>) T cells in  
544 the spleen were quantified by flow cytometry. Data are Mean  $\pm$  SEM; the data represent  
545 one of two independent experiments (A-C) or are pooled from two independent  
546 experiments (D-E). \*, \*\*, \*\*\*, and \*\*\*\* indicate significance at  $P < 0.1$ , 0.01, 0.001, and  
547 0.0001 respectively. (One-way ANOVA: A-C; Mann-Whitney U test-D-E).

548

549

550

551

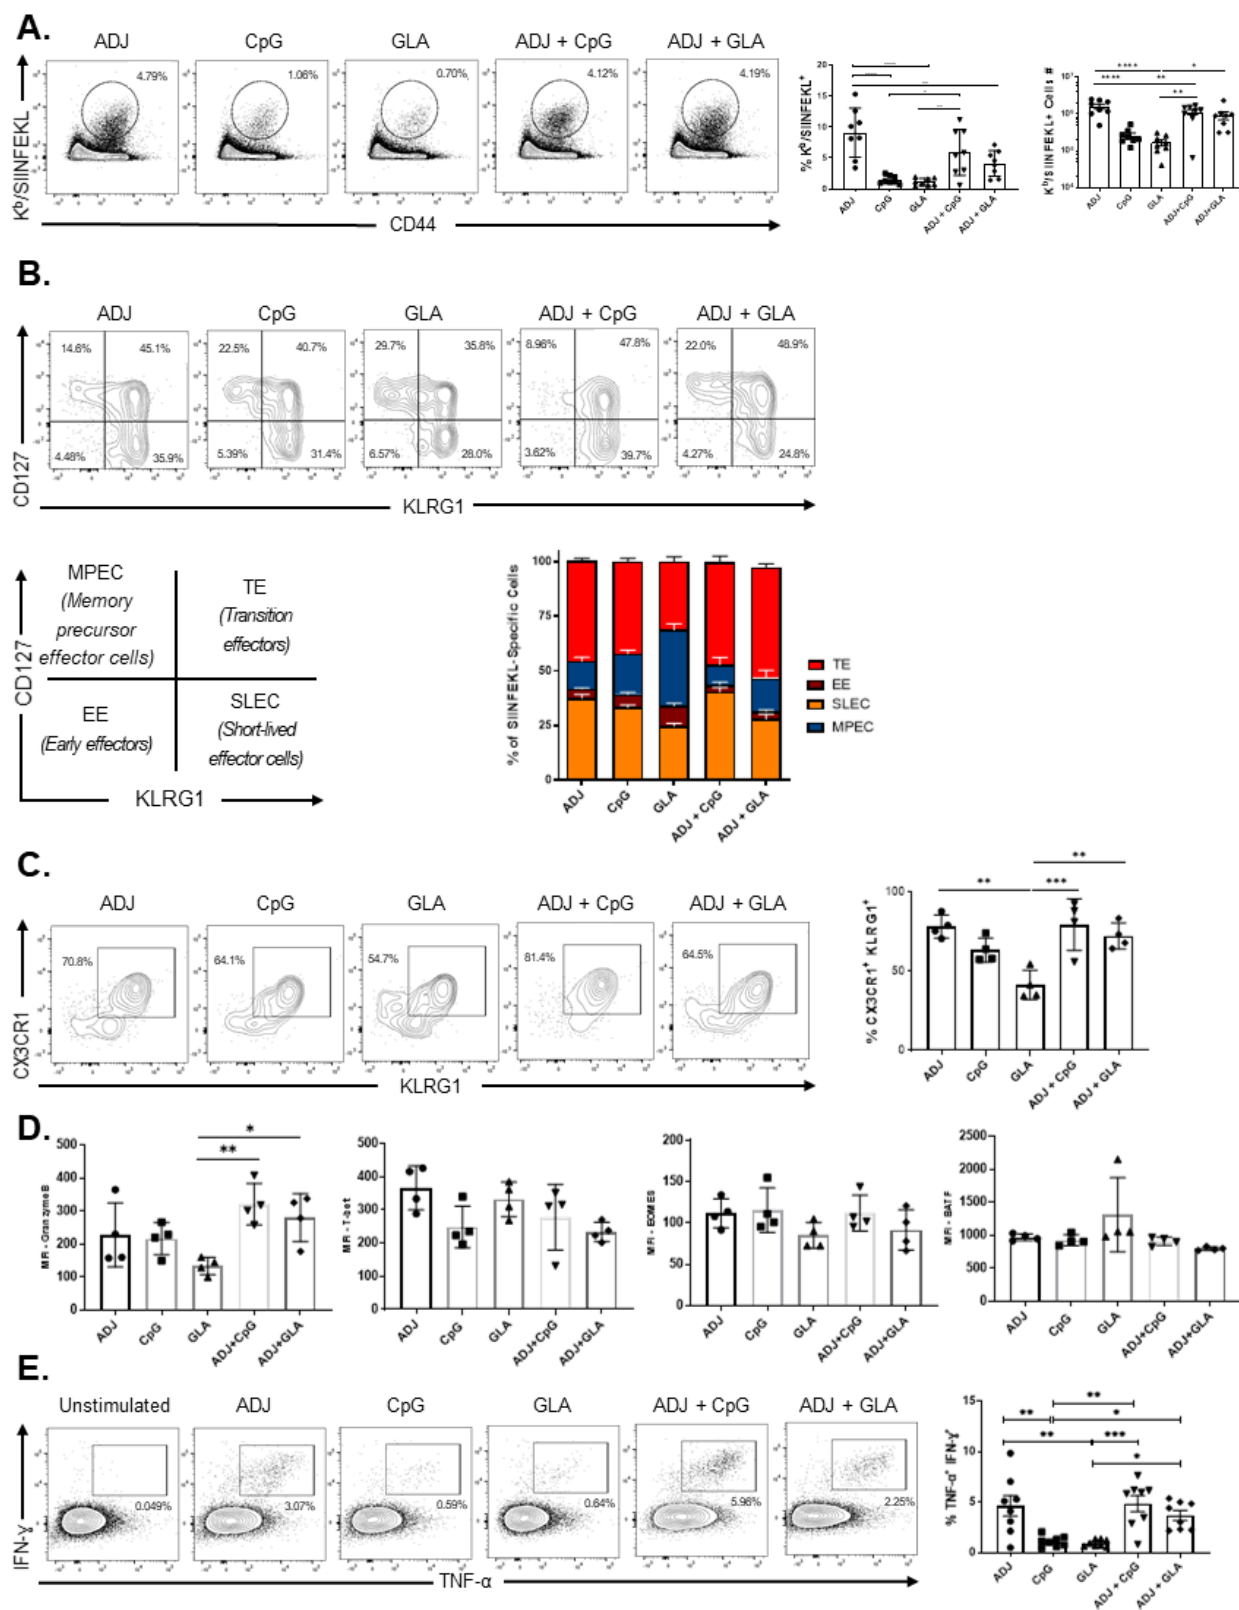

553 **Figure 3. Effector CD8 T-cell responses to adjuvanted vaccines.** Mice were  
554 vaccinated SQ with OVA formulated in ADJ, CpG, GLA, ADJ+CpG, or ADJ+GLA. Twenty-  
555 one days after the first vaccination, mice were boosted with the same formulation. On the  
556 8<sup>th</sup> day after booster vaccination, single-cell suspensions from spleen were stained with  
557 D<sup>b</sup>/SIINFEKL tetramers, anti-CD8, anti-CD44, anti-CD127, anti-KLRG-1, anti-CX3CR1,  
558 anti-granzyme B, anti-T-bet, anti-EOMES, and anti-BATF antibodies. (A) Percentages  
559 and total numbers of OVA SIINFEKL-specific CD8 T cells in spleens. FACS plots in A are  
560 gated on total CD8 T cells and the numbers are the percentages of tetramer-binding cells  
561 among the gated population. (B-D) FACS plots are gated on tetramer-binding CD8 T cells  
562 and numbers are percentages of the gated cells, in respective gates/quadrants. (E)  
563 Median fluorescence intensities (MFI) for transcription factors in SIINFEKL-specific CD8  
564 T cells. (F) Functional polarization of effector CD8 cells. The percentages of CD8 T cells  
565 that produced IFN- $\gamma$  and TNF- $\alpha$  following stimulation with SIINFEKL peptide were  
566 quantified by intracellular cytokine staining. Unstimulated control without the SIINFEKL  
567 peptide served as a negative control. Data in each graph indicate Mean  $\pm$  SEM. Data are  
568 pooled from two independent experiments (A, E) or represent one of two independent  
569 experiments (B-D). Each independent experiment had n=3-5 mice per group. \*, \*\*, \*\*\*,  
570 and \*\*\*\* indicate significance at  $P < 0.1$ , 0.01, 0.001, and 0.0001 respectively. (One-way  
571 ANOVA: A-F)

572

573

574

575

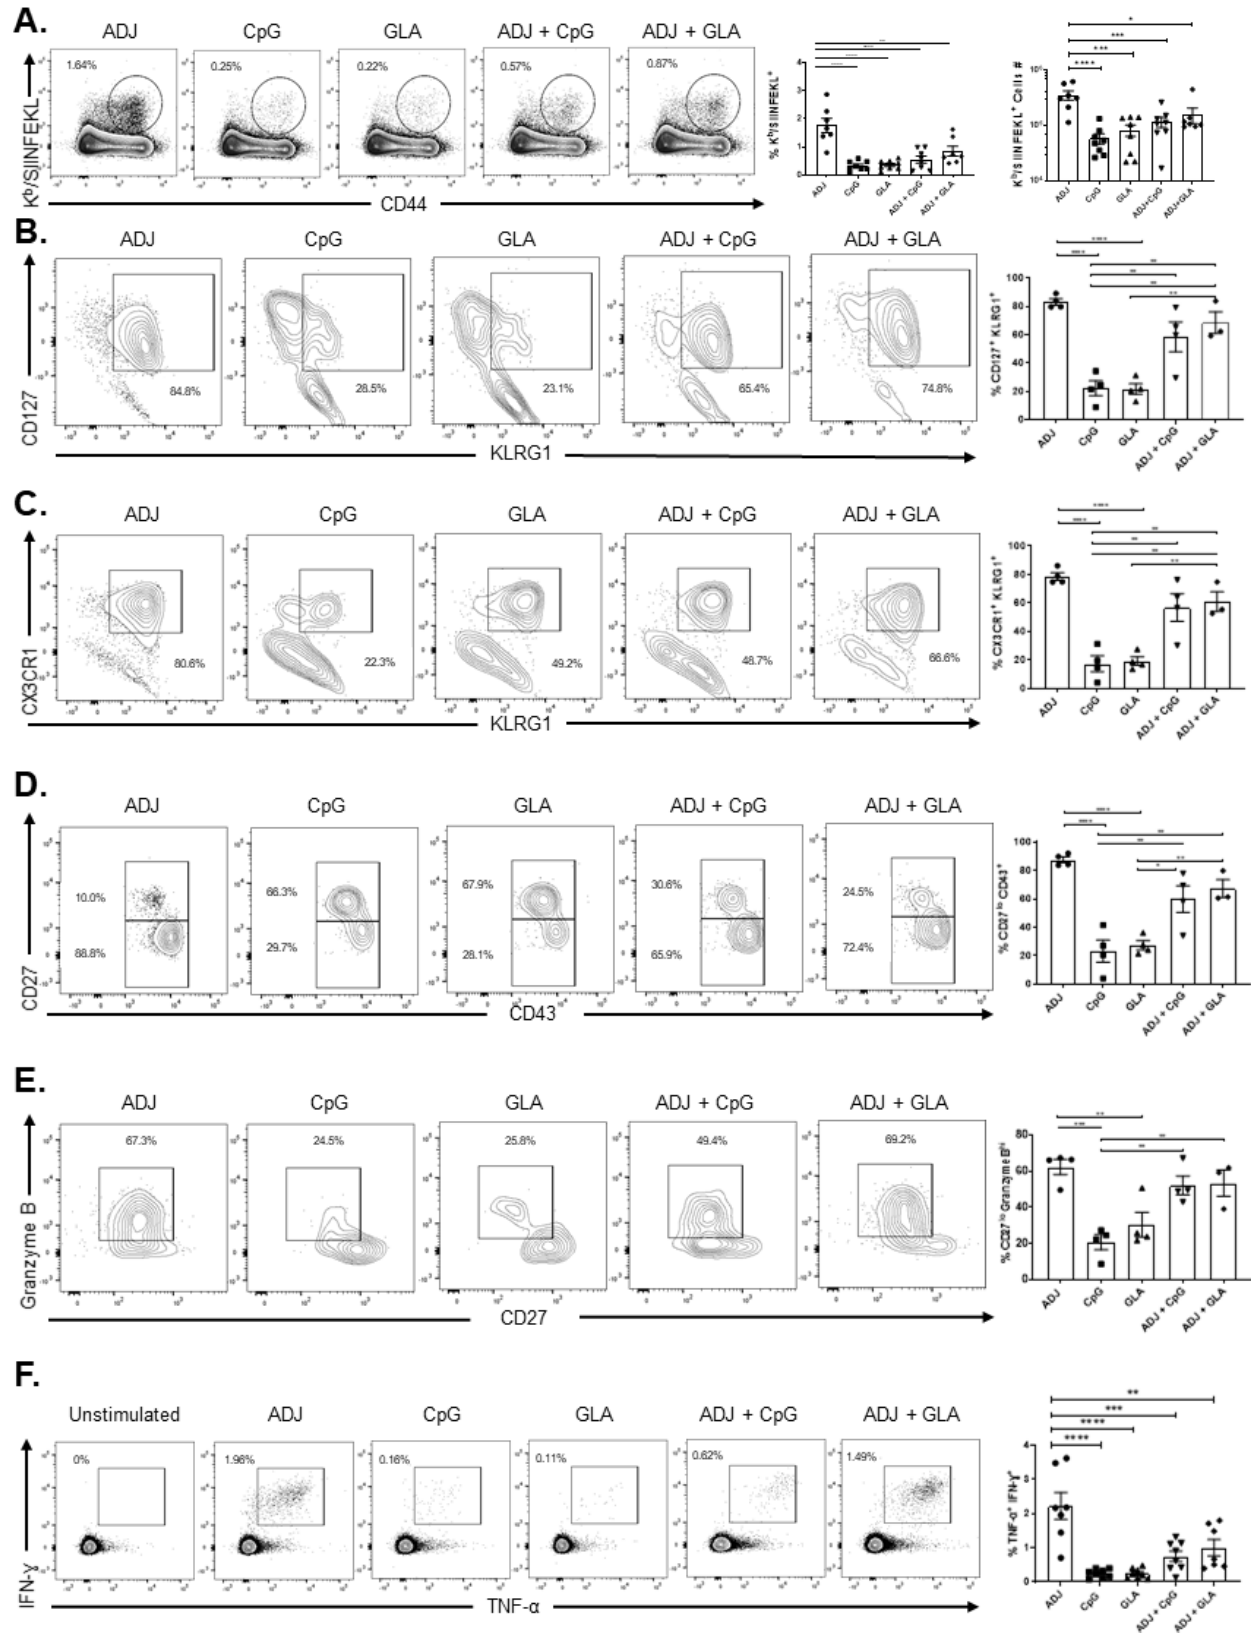

576



577 **Figure 4. Vaccine-induced CD8 T-cell memory.** Mice were vaccinated twice (3 weeks  
578 apart) SQ with OVA (10ug/mouse) formulated in ADJ, CpG, GLA, ADJ+CpG, ADJ+GLA.  
579 Forty days after the booster vaccination, single-cell suspensions cells of spleen were  
580 stained with D<sup>b</sup>/SIINFEKL tetramers, anti-CD8, anti-CD44, anti-CD127, anti-KLRG-1,  
581 anti-CX3CR1, anti-CD43, anti-CD27, and anti-granzyme B antibodies. (A) Percentages  
582 and total numbers of OVA SIINFEKL-specific CD8 T cells in spleens. (B-E) FACS plots  
583 show percentages of gated tetramer-binding CD8 T cells in respective gates/quadrants.  
584 (F) Functional polarization of memory CD8 T cells. The percentages of SIIFNEKL-specific  
585 CD8 T cells that produced IFN- $\gamma$  and TNF- $\alpha$  were quantified by intracellular cytokine  
586 staining. Cells cultured without SIINFEKL peptide stimulation were used as a negative  
587 control. Data in each graph show Mean  $\pm$  SEM. Data are pooled from two independent  
588 experiments (A, F) or represent one of two independent experiments (B-E). Each  
589 independent experiment had n=3-5 mice per group. \*, \*\*, \*\*\*, and \*\*\*\* indicate significance  
590 at  $P < 0.1$ , 0.01, 0.001, and 0.0001 respectively. (One-way ANOVA: A-F)

591

592

593

594

595

596

597

598

599



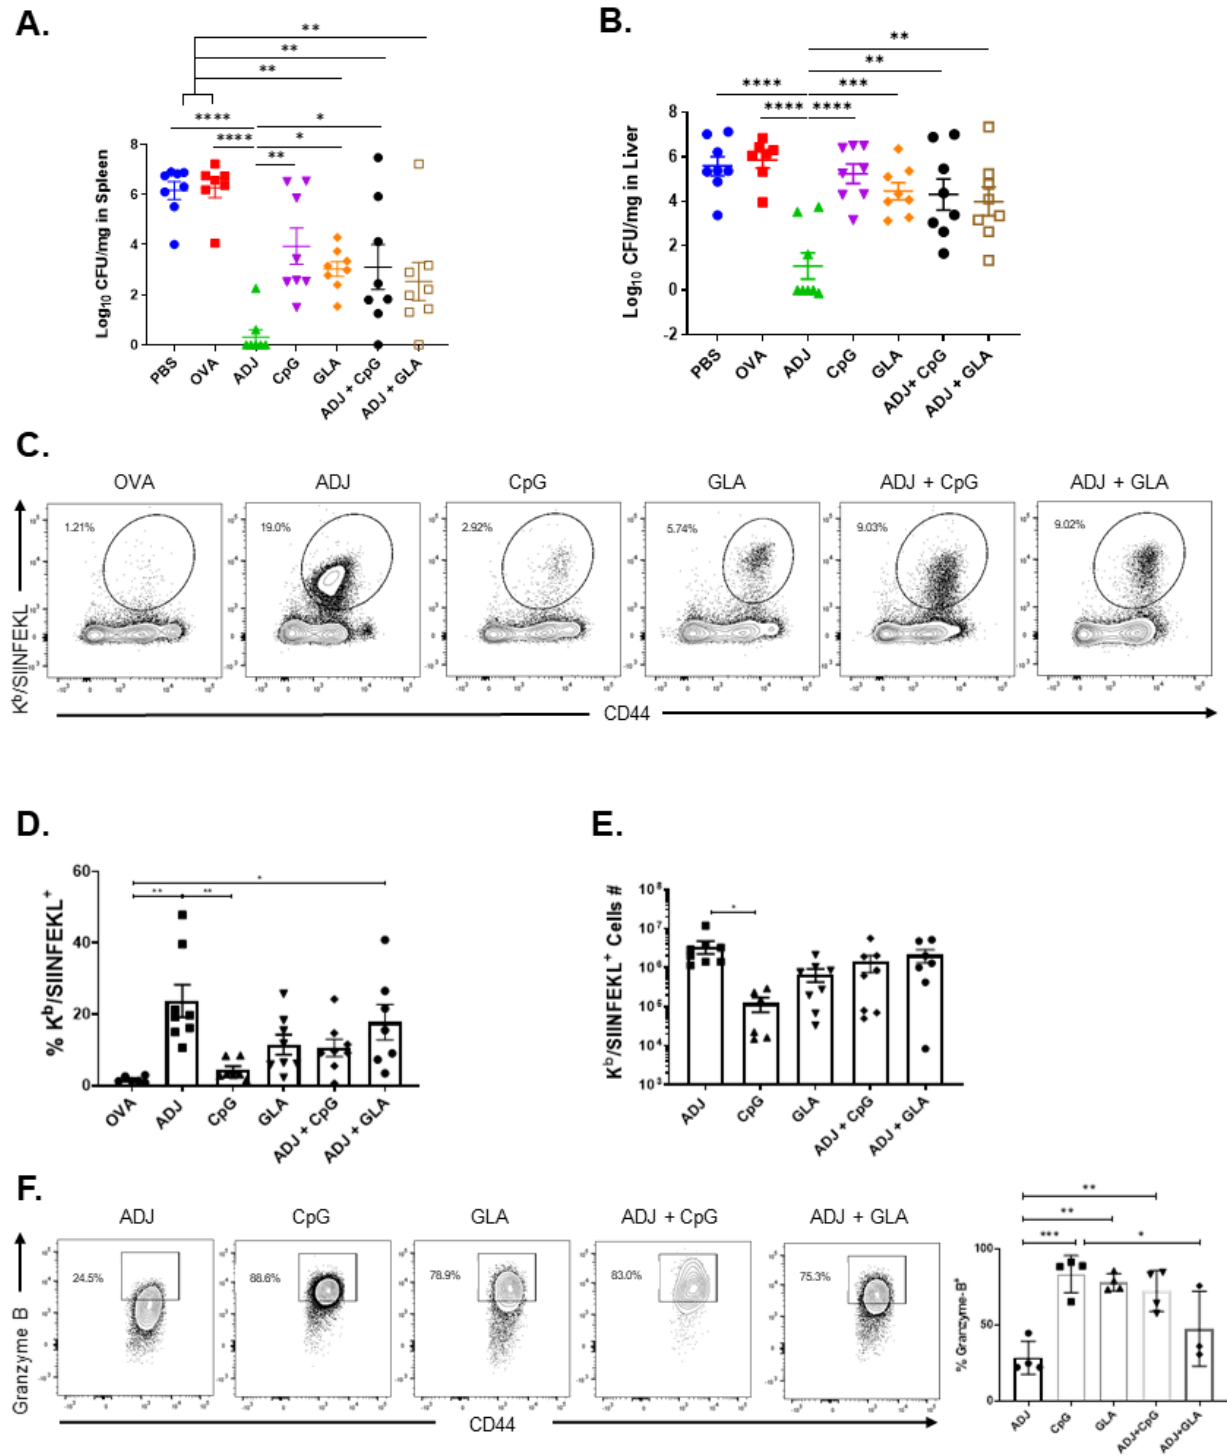

601 **Figure 5. Vaccine-induced protective immunity to Listeria.** Mice were vaccinated  
602 twice (3 weeks apart) SQ with OVA (10ug/mouse) formulated in ADJ, CpG, GLA,  
603 ADJ+CpG, ADJ+GLA. Forty days after the booster vaccination, mice were challenged  
604 with virulent recombinant OVA-expressing Listeria (LM-OVA) and sacrificed at day 5. (A)  
605 Listeria burden was quantified in the spleens and livers on the 5<sup>th</sup> day after challenge. (B)  
606 Single-cell suspensions of spleen were stained with D<sup>b</sup>/SIINFEKL tetramers, anti-CD8,  
607 anti-CD44, and anti-granzyme B antibodies. (C) or (F) FACS plots show percentages of  
608 gated tetramer-binding CD8 T cells in respective gates. (D-E) Percentages and total  
609 numbers of OVA SIINFEKL-specific CD8 T cells in spleens. Data in each graph show  
610 Mean  $\pm$  SEM. Data are pooled from two independent experiments (A-E) or represent one  
611 of two independent experiments (F). Each independent experiment had n=3-5 mice per  
612 group. \*, \*\*, \*\*\*, and \*\*\*\* indicate significance at  $P < 0.1$ , 0.01, 0.001, and 0.0001  
613 respectively. (One-way ANOVA: A-F)

614

615

616

617

618

619

620

621

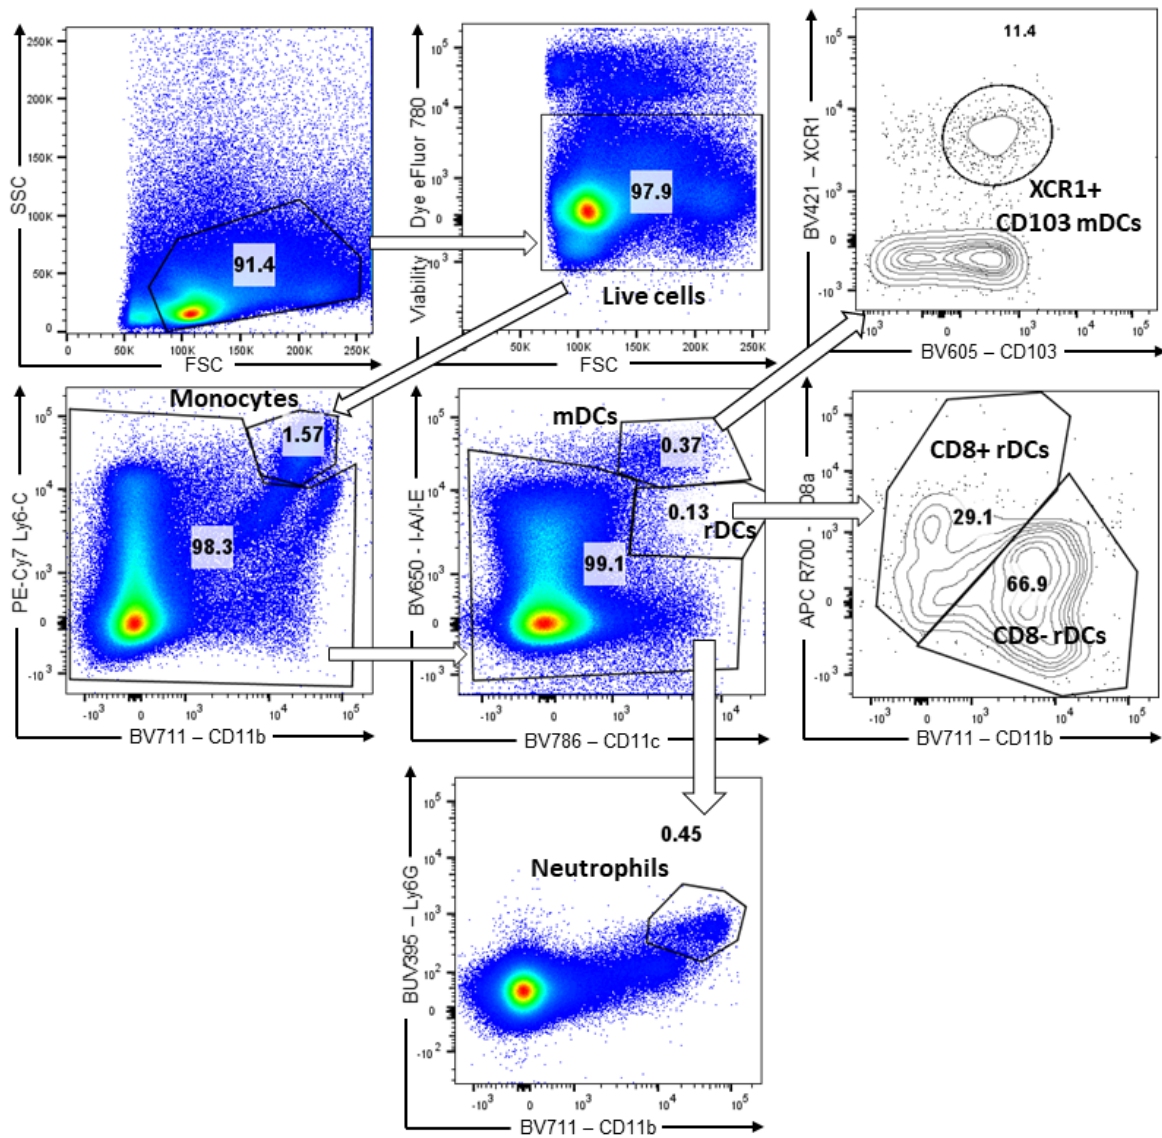

623 **Supplementary Figure 1. Analysis of innate immune cells in draining nodes of**  
624 **vaccinated mice.** Gating strategy for innate immune cell subsets in draining popliteal  
625 lymph nodes (DLNs). Single cell suspensions of DLN were stained with antibodies to  
626 Ly6G, XCR1, CD80, CD86, CD103, MHC-II, CD11b, CD11c, Ly6C, and CD8 $\alpha$ .

627

628

629

630

631

632

633

634

635

636

637

638

639

640

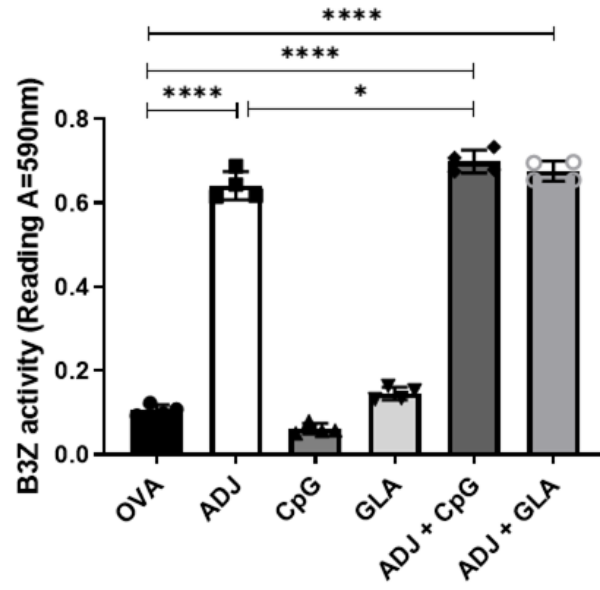

642 **Supplementary Figure 2. Effect of combination adjuvants on cross-presentation by**  
643 **bone marrow-derived DCs.** BMDCs were exposed to media or OVA ± ADJ, CpG or GLA  
644 for 5 h, and co-cultured with B3Z cells for 24 h. β-galactosidase in co-cultured B3Z cells  
645 was quantified by CPRG colorimetry. Data in graph show Mean ± SEM. Data represent  
646 one of two independent experiments. Each independent experiment had triplicates per  
647 group. \*, \*\*, \*\*\*, and \*\*\*\* indicate significance at  $P < 0.1$ , 0.01, 0.001, and 0.0001  
648 respectively.

649

650

651 **Supplementary Table 1: List of antibodies and tetramers used in this study**

| <b>Antibody (Dilution Factor)</b>                        | <b>Company</b> | <b>Catalogue number</b> |
|----------------------------------------------------------|----------------|-------------------------|
| Rat anti-mouse Ly-6G-conjugated (1:200)                  | BD Biosciences | 563978                  |
| Rat anti-mouse I-A/I-E-BV650-conjugated (1:400)          | BD Biosciences | 563415                  |
| Rat anti-mouse CD11b-BV711-conjugated (1:400)            | BD Biosciences | 563168                  |
| Hamster anti-mouse CD11c-BV786-conjugated (1:100)        | BD Biosciences | 563735                  |
| Rat anti-mouse CD86-BV510-conjugated (1:200)             | BD Biosciences | 563077                  |
| Rat anti-mouse Ly-6C-PE-Cy7-conjugated (1:400)           | BD Biosciences | 560593I                 |
| Rat anti-mouse CD8 $\alpha$ -APC-R700-conjugated (1:200) | BD Biosciences | 564983                  |
| Rat anti-mouse CD8 $\alpha$ -BUV395-conjugated (1:200)   | BD Biosciences | 563786                  |
| Rat anti-mouse CD4-BUV496-conjugated (1:200),            | BD Biosciences | 564667                  |
| Rat anti-mouse CD44-BV510-conjugated (1:200)             | BD Biosciences | 563114                  |
| Rat anti-mouse CD62L-PE-CF594-conjugated (1:200)         | BD Biosciences | 562404                  |

|                                                         |                |        |
|---------------------------------------------------------|----------------|--------|
| Rat anti-mouse CD62L-PE-CF594-conjugated (1:200)        | BD Biosciences | 562404 |
| Rat anti-mouse B220-PerCP-conjugated (1:200)            | BD Biosciences | 552879 |
| Hamster anti-mouse-CD69-PE-Cy7-conjugated (1:200)       | BD Biosciences | 553237 |
| BUV496-streptavidin (1:400)                             | BD Biosciences | 564666 |
| mouse anti-mouse T-bet-BV421 conjugated (1:200)         | BD Biosciences | 563318 |
| rat anti-mouse IFN- $\gamma$ -APC-conjugated (1:400)    | BD Biosciences | 554413 |
| rat anti-mouse TNF- $\alpha$ -BV421-conjugated (1:500)  | BD Biosciences | 554413 |
| rat anti-mouse XCR1-BV421-conjugated (1:100)            | Biolegend      | 148216 |
| rat anti-mouse CD103-BV605-conjugated (1:200)           | Biolegend      | 121433 |
| mouse anti-mouse CD64 (Fc $\gamma$ RI) Antibody (1:200) | Biolegend      | 139308 |
| rat anti-mouse CD127- PerCP/Cyanine5.5 (1:150)          | Biolegend      | 135022 |
| hamster anti-mouse KLRG1-BV711-conjugated (1:200)       | Biolegend      | 564014 |



|                                                                                 |                            |              |
|---------------------------------------------------------------------------------|----------------------------|--------------|
| mouse anti-mouse CX3CR1-BV785-conjugated (1:200)                                | Biolegend                  | 149029       |
| Hamster anti-mouse-CD80-biotin-conjugated (1:200)                               | Biolegend                  | 104704       |
| Rat anti-mouse Granzyme B-BV421-conjugated (5ul/well).                          | Biolegend                  | 396414       |
| Rat anti-mouse CD19-PE-Cy7-conjugated (1:200)                                   | eBioscience                | 25-0193-82   |
| Rat anti-mouse Granzyme B-PE-conjugated (5ul/well)                              | eBioscience                | MHGB04       |
| rat anti-mouse EOMES-PE-eFluor 610 conjugated (1:200)                           | eBioscience                | 61-4875-82   |
| mouse anti-human BATF-PerCP-eFluor 710 conjugated (5ul/well)                    | eBioscience                | 46-9860-42D  |
| APC-conjugated H2-K <sup>b</sup> tetramers bearing the SIINFEKL peptide (1:150) | NIH Tetramer Core Facility | N/A          |
| Purified Anti-Mouse CD16 / CD32 (Fc Shield) (2.4G2)                             | Tonbo Biosciences          | 70-0161-U500 |

652

653

654

655

656 BIBLIOGRAPHY

- 657 1. Amanna IJ, Slifka MK. 2009. Wanted, dead or alive: new viral vaccines. *Antiviral*  
658 *Res* 84:119-30.
- 659 2. Pulendran B, Oh JZ, Nakaya HI, Ravindran R, Kazmin DA. 2013. Immunity to  
660 viruses: learning from successful human vaccines. *Immunol Rev* 255:243-55.
- 661 3. Kretzschmar M, Wallinga J, Teunis P, Xing S, Mikolajczyk R. 2006. Frequency of  
662 adverse events after vaccination with different vaccinia strains. *PLoS Med*  
663 3:e272.
- 664 4. Kitchener S. 2004. Viscerotropic and neurotropic disease following vaccination  
665 with the 17D yellow fever vaccine, ARILVAX. *Vaccine* 22:2103-5.
- 666 5. Lindsey NP, Schroeder BA, Miller ER, Braun MM, Hinckley AF, Marano N, Slade  
667 BA, Barnett ED, Brunette GW, Horan K, Staples JE, Kozarsky PE, Hayes EB.  
668 2008. Adverse event reports following yellow fever vaccination. *Vaccine* 26:6077-  
669 82.
- 670 6. Struchiner CJ, Luz PM, Dourado I, Sato HK, Aguiar SG, Ribeiro JG, Soares RC,  
671 Codeco CT. 2004. Risk of fatal adverse events associated with 17DD yellow  
672 fever vaccine. *Epidemiol Infect* 132:939-46.
- 673 7. Coffman RL, Sher A, Seder RA. Vaccine adjuvants: putting innate immunity to  
674 work. *Immunity* 33:492-503.
- 675 8. Foged C, Hansen J, Agger EM. License to kill: Formulation requirements for  
676 optimal priming of CD8(+) CTL responses with particulate vaccine delivery  
677 systems. *Eur J Pharm Sci*.
- 678 9. Nordly P, Rose F, Christensen D, Nielsen HM, Andersen P, Agger EM, Foged C.  
679 Immunity by formulation design: induction of high CD8+ T-cell responses by  
680 poly(I:C) incorporated into the CAF01 adjuvant via a double emulsion method. *J*  
681 *Control Release* 150:307-17.
- 682 10. Koff WC, Burton DR, Johnson PR, Walker BD, King CR, Nabel GJ, Ahmed R,  
683 Bhan MK, Plotkin SA. 2013. Accelerating next-generation vaccine development  
684 for global disease prevention. *Science* 340:1232910.
- 685 11. Brito LA, O'Hagan DT. 2014. Designing and building the next generation of  
686 improved vaccine adjuvants. *J Control Release* 190:563-79.
- 687 12. Walker BD, Ahmed R, Plotkin S. Moving ahead an HIV vaccine: Use both arms  
688 to beat HIV. *Nat Med* 17:1194-5.
- 689 13. Pantaleo G, Koup RA. 2004. Correlates of immune protection in HIV-1 infection:  
690 what we know, what we don't know, what we should know. *Nat Med* 10:806-10.
- 691 14. Hoft DF. 2008. Tuberculosis vaccine development: goals, immunological design,  
692 and evaluation. *Lancet* 372:164-75.
- 693 15. Reyes-Sandoval A, Pearson FE, Todryk S, Ewer K. 2009. Potency assays for  
694 novel T-cell-inducing vaccines against malaria. *Curr Opin Mol Ther* 11:72-80.
- 695 16. Anlar S, Capan Y, Hincal AA. 1993. Physico-chemical and bioadhesive  
696 properties of polyacrylic acid polymers. *Pharmazie* 48:285-7.
- 697 17. Anonymous. 1982. Final assessment report of the safety of carbomers-934, 910,  
698 934P, 940, 941, and 72. *Journal of the American College of Toxicology* 1:109-  
699 141.

- 700 18. Singla AK, Chawla M, Singh A. 2000. Potential applications of carbomer in oral  
701 mucoadhesive controlled drug delivery system: a review. *Drug Dev Ind Pharm*  
702 26:913-24.
- 703 19. Florence AT, Jani PU. 1994. Novel oral drug formulations. Their potential in  
704 modulating adverse effects. *Drug Saf* 10:233-66.
- 705 20. Fujiwara M, Baldeschwieler JD, Grubbs RH. 1996. Receptor-mediated  
706 endocytosis of poly(acrylic acid)-conjugated liposomes by macrophages. *Biochim*  
707 *Biophys Acta* 1278:59-67.
- 708 21. McGrath JJ, Purkiss LQ, Eberle M, McGrath WR. 1995. Long-term effects of a  
709 cross-linked polyacrylate superabsorbent in the hamster. *J Appl Toxicol* 15:69-  
710 73.
- 711 22. Gualandi GL, Losio NM, Muratori G, Foni E. 1988. The ability by different  
712 preparations of porcine parvovirus to enhance humoral immunity in swine and  
713 guinea pigs. *Microbiologica* 11:363-9.
- 714 23. Mumford JA, Wilson H, Hannant D, Jessett DM. 1994. Antigenicity and  
715 immunogenicity of equine influenza vaccines containing a Carbomer adjuvant.  
716 *Epidemiol Infect* 112:421-37.
- 717 24. Gupta PK, Mukherjee P, Dhawan S, Pandey AK, Mazumdar S, Gaur D, Jain SK,  
718 Chauhan VS. 2014. Production and preclinical evaluation of Plasmodium  
719 falciparum MSP-119 and MSP-311 chimeric protein, PfMSP-Fu24. *Clin Vaccine*  
720 *Immunol* 21:886-97.
- 721 25. Chakrabarti BK, Feng Y, Sharma SK, McKee K, Karlsson Hedestam GB,  
722 Labranche CC, Montefiori DC, Mascola JR, Wyatt RT. 2013. Robust neutralizing  
723 antibodies elicited by HIV-1 JRFL envelope glycoprotein trimers in nonhuman  
724 primates. *J Virol* 87:13239-51.
- 725 26. Wegmann F, Moghaddam AE, Schiffner T, Gartlan KH, Powell TJ, Russell RA,  
726 Baart M, Carrow EW, Sattentau QJ. 2015. The carbomer-lecithin adjuvant  
727 Adjuplex has potent immune activating properties and elicits protective adaptive  
728 immunity against influenza challenge in mice. *Clin Vaccine Immunol*  
729 doi:10.1128/CVI.00736-14.
- 730 27. Krashias G, Simon AK, Wegmann F, Kok WL, Ho LP, Stevens D, Skehel J,  
731 Heeney JL, Moghaddam AE, Sattentau QJ. Potent adaptive immune responses  
732 induced against HIV-1 gp140 and influenza virus HA by a polyanionic carbomer.  
733 *Vaccine* 28:2482-9.
- 734 28. Gasper DJ, Neldner B, Plisch EH, Rustom H, Carrow E, Imai H, Kawaoka Y,  
735 Suresh M. 2016. Effective Respiratory CD8 T-Cell Immunity to Influenza Virus  
736 Induced by Intranasal Carbomer-Lecithin-Adjuvanted Non-replicating Vaccines.  
737 *PLoS Pathog* 12:e1006064.
- 738 29. Marinaik CB, Kingstad-Bakke B, Lee W, Hatta M, Sonsalla M, Larsen A, Neldner  
739 B, Gasper DJ, Kedl RM, Kawaoka Y, Suresh M. 2020. Programming Multifaceted  
740 Pulmonary T Cell Immunity by Combination Adjuvants. *Cell Rep Med* 1:100095.
- 741 30. Mahabeleshwar GH, Kawanami D, Sharma N, Takami Y, Zhou G, Shi H, Nayak  
742 L, Jeyaraj D, Grealy R, White M, McManus R, Ryan T, Leahy P, Lin Z, Haldar  
743 SM, Atkins GB, Wong HR, Lingrel JB, Jain MK. 2011. The myeloid transcription  
744 factor KLF2 regulates the host response to polymicrobial infection and endotoxic  
745 shock. *Immunity* 34:715-28.

- 746 31. Ghosh M, Shapiro LH. 2012. In vitro Ag Cross-presentation and in vivo Ag Cross-  
747 presentation by Dendritic Cells in the Mouse. *Bio Protoc* 2:e305.
- 748 32. Karttunen J, Sanderson S, Shastri N. 1992. Detection of rare antigen-presenting  
749 cells by the lacZ T-cell activation assay suggests an expression cloning strategy  
750 for T-cell antigens. *Proc Natl Acad Sci U S A* 89:6020-4.
- 751 33. Hildner K, Edelson BT, Purtha WE, Diamond M, Matsushita H, Kohyama M,  
752 Calderon B, Schraml BU, Unanue ER, Diamond MS, Schreiber RD, Murphy TL,  
753 Murphy KM. 2008. *Batf3* deficiency reveals a critical role for CD8alpha+ dendritic  
754 cells in cytotoxic T cell immunity. *Science* 322:1097-100.
- 755 34. Olson JA, McDonald-Hyman C, Jameson SC, Hamilton SE. 2013. Effector-like  
756 CD8(+) T cells in the memory population mediate potent protective immunity.  
757 *Immunity* 38:1250-60.
- 758 35. Walker BD, Ahmed R, Plotkin S. 2011. Moving ahead an HIV vaccine: use both  
759 arms to beat HIV. *Nat Med* 17:1194-5.
- 760 36. Querec T, Bennouna S, Alkan S, Laouar Y, Gorden K, Flavell R, Akira S, Ahmed  
761 R, Pulendran B. 2006. Yellow fever vaccine YF-17D activates multiple dendritic  
762 cell subsets via TLR2, 7, 8, and 9 to stimulate polyvalent immunity. *J Exp Med*  
763 203:413-24.
- 764 37. Lee S, Nguyen MT. 2015. Recent advances of vaccine adjuvants for infectious  
765 diseases. *Immune Netw* 15:51-7.
- 766 38. Jameson SC, Masopust D. 2018. Understanding Subset Diversity in T Cell  
767 Memory. *Immunity* 48:214-226.
- 768 39. Na YR, Jung D, Gu GJ, Seok SH. 2016. GM-CSF Grown Bone Marrow Derived  
769 Cells Are Composed of Phenotypically Different Dendritic Cells and  
770 Macrophages. *Mol Cells* 39:734-741.
- 771 40. Jin D, Sprent J. 2018. GM-CSF Culture Revisited: Preparation of Bulk  
772 Populations of Highly Pure Dendritic Cells from Mouse Bone Marrow. *J Immunol*  
773 201:3129-3139.
- 774 41. Kim EH, Woodruff MC, Grigoryan L, Maier B, Lee SH, Mandal P, Cortese M,  
775 Natrajan MS, Ravindran R, Ma H, Merad M, Gitlin AD, Mocarski ES, Jacob J,  
776 Pulendran B. 2020. Squalene emulsion-based vaccine adjuvants stimulate CD8  
777 T cell, but not antibody responses, through a RIPK3-dependent pathway. *Elife* 9.

778
